# Supplementary material for: Attaining Whole-Ecosystem Warming Using Air and Deep Soil Heating Methods with an Elevated CO 2 Atmosphere
Source: Copernicus journal article supplement (doi:10.5194/bg-2016-449), 2016-11-01
Supplement: Supplementary file 1 [file bg-2016-449-supplement.pdf]

1174 Supplemental Materials for  
1175

## 1176 **Attaining Whole-Ecosystem Warming Using Air and Deep Soil** 1177 **Heating Methods with an Elevated CO<sub>2</sub> Atmosphere**

1178  
1179 Paul J. Hanson, Jeffery S. Riggs, W. Robert Nettles, Jana R. Phillips, Misha B. Krassovski,  
1180 Leslie A. Hook, Andrew D. Richardson, Donald M. Aubrecht,  
1181 Jeffrey Warren and Charlotte Barbier  
1182

### 1183 **Surface Peat Moisture Measurements (Jeff Warren)**

1184 Intact *Sphagnum* peat monoliths were extracted from the S1-Bog into plastic containers (~7 L),  
1185 and 10 replicates were taken to the Oak Ridge National Laboratory (ORNL) for calibration, and  
1186 four replicates were sent to Decagon for factory calibration. One or two 10HS sensors were  
1187 installed into each monolith, then water was added to the container to fully saturate the peat  
1188 monolith and containers were placed into a plant growth chamber. Gravimetric water content  
1189 was measured periodically as the monoliths dried down over several months and paired with the  
1190 sensor mV output to create a custom calibration curve. During this period the *Sphagnum* surface  
1191 (capitulum) water content was periodically assessed to derive a relationship between soil water  
1192 content and surface water content – thereby providing data that is directly related to sphagnum  
1193 photosynthetic activity. The ORNL- and Decagon-based soil water calibration curves were  
1194 similar, and using all 14 replicates resulted in a decent curve, where volumetric water content as  
1195  $VMC = -0.731 + 0.508e^{(0.00995mV)}$  where mV is the voltage signal output from the sensors  
1196 ( $R^2=0.92$ ; Supplemental Fig. S1).  
1197

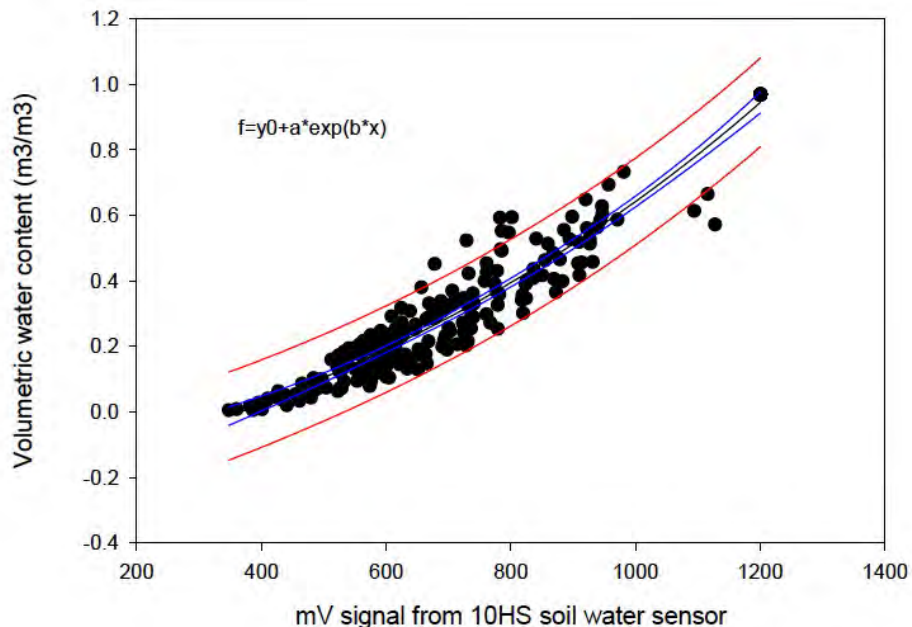

1198  
1199 **Figure S1:** Calibration curve for the 10HS soil water sensor in peat.

1200 **Spectral Characteristics of the SPRUCE Enclosure Glazing (D. M. Aubrecht)**

1201 The spectral characteristics of the SPRUCE enclosure greenhouse panel glazing was evaluated  
1202 from 250 nm to 20 microns using two radiometrically-calibrated directional hemispherical  
1203 reflectance (DHR) spectrophotometers. One instrument measures UV/VNIR/SWIR (250 nm -  
1204 2.5 micron) and the second measures mid- and long-wave infrared radiation (MWIR/LWIR; 2 -  
1205 20 micron). All data include specular reflections.

1206  
1207 The UV/VNIR/SWIR instrument is a Perkin-Elmer Lambda 750S spectrometer with a 100mm  
1208 Spectralon integrating sphere and dual PMT and InGaAs detectors. The sample beam is incident  
1209 at 8° from the sample surface normal. Data are collect at 1 nm resolution with 1 nm step size,  
1210 and reflectance values are referenced to 99%R Spectralon. Data shown below are the mean of  
1211 five independently sampled spectra.

1212  
1213 The second instrument is a Thermo Scientific Nicolet iS10 FTIR spectrometer with a 3” Pike  
1214 IntegratIR roughened gold integrating sphere and liquid nitrogen-cooled MCT detector. The  
1215 sample beam strikes the sample surface at 12° from the surface normal. The sphere and internal  
1216 beam path are purged with ultra pure dry nitrogen for 1 hour ahead of data collection in order to  
1217 minimize absorption signals from CO<sub>2</sub> and H<sub>2</sub>O in the atmosphere. Individual spectra are the  
1218 mean of 64 samples are referenced to roughened gold. Data are presented at 4 cm<sup>-1</sup> resolution  
1219 and plots below are the mean of 10 independently sampled individual spectra.

1220 Figure S2, below plots the greenhouse panel reflectance in comparison to the incoming solar  
1221 spectrum (NREL “Global Tilt” data which accounts for all the solar energy that will interact with  
1222 the SPRUCE enclosures), and the ideal blackbody radiation spectrum emitted by objects at 30°C  
1223 and 0°C. There are two panel curves in the 2 – 2.5 micron region, where the two  
1224 spectrophotomers overlap. Though the instruments give slightly different values, the overall  
1225 magnitudes are in good agreement. Transmission data was also collected for the UV/VNIR, but  
1226 is not shown. Transmission data for the MWIR was not collected, since at those wavelengths, the  
1227 panels absorb all energy that they do not reflect.

1228  
1229 We note the following characteristics of the greenhouse panels:

- 1230 1) the panels absorb most of the UV and prevent it from entering the SPRUCE enclosures  
1231 2) the panels transmit the majority of VNIR radiation and reflect only a small portion at these  
1232 wavelengths.  
1233 3) the panels absorb >90% of the incoming MWIR/LWIR radiation (>3 microns)  
1234 4) the one part of the MWIR spectrum the panels reflect coincides with the peak of thermal  
1235 radiation from objects that are 0-30°C (8-10 microns).

1236  
1237 As the SPRUCE greenhouse panels transmit most of the VNIR wavelengths, PAR is reduced  
1238 inside the enclosure, but only minimally. In the MWIR/LWIR, the story becomes more  
1239 complicated. Since and the enclosure walls absorb most of the incoming radiation, the panels are  
1240 likely a couple of degrees warmer than ambient air temperature when the sun is shining. In  
1241 addition, the panels have a strong reflection feature at ~9 microns that reflects a fraction of the  
1242 thermal energy emitted by the air, vegetation, and enclosure walls is back into the enclosure.  
1243 Thermal energy from the interior that is not reflected ends up being absorbed by the panels and  
1244 reemitted back into the chamber.

1245

1246 Therefore, the presence of the SPRUCE enclosure walls do not have a drastic effect on ambient  
 1247 PAR for the enclosed vegetation (20% reduction, as shown in Fig. 8), with the exception of  
 1248 shadows cast by the structure. However, the enclosure will minimize heat loss to the  
 1249 surroundings, and keep surface conditions within the enclosures warmer day and night than  
 1250 similar surfaces in the bog that are fully open to the sky. Since the frustum opening restricts  
 1251 radiation losses to the sky (in terms of solid angle), the interior of the enclosure cool slower than  
 1252 unchambered ambient plots, and the interior microenvironment of the enclosure behaves more  
 1253 like the understory of a closed forest canopy. Instead of seeing 180° of cold, clear sky, as the  
 1254 unchambered ambient plots do, the interior of SPRUCE enclosures experience a warmer  
 1255 apparent sky temperature with increased incoming longwave radiation, as shown in Fig. 9.  
 1256

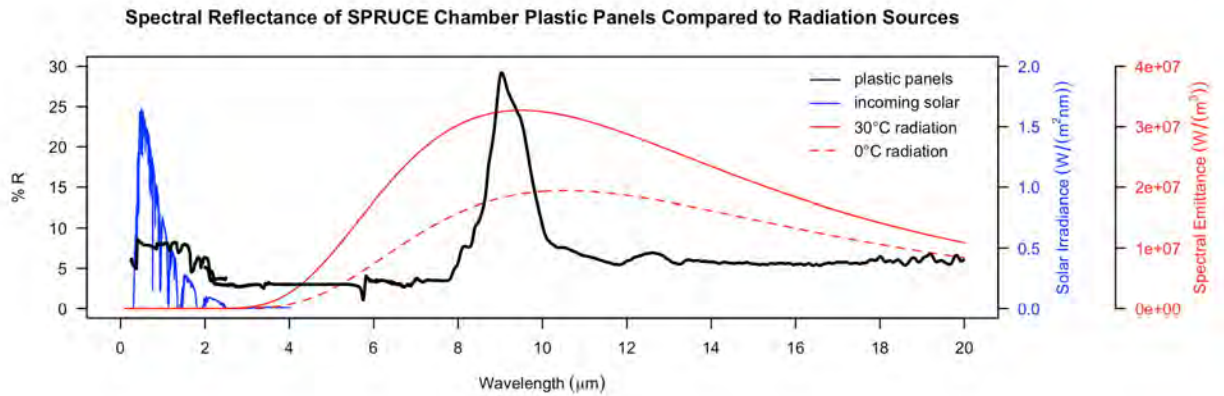

1257 **Figure S2:** Spectral reflectance of SPRUCE enclosure plastic panels compared to radiation  
 1258 sources.  
 1259

1260  
 1261  
 1262

1263 **Air warming PID details**  
1264  
1265 MAU\_Control = TA\_2M\_AVG\_5minAmb + (Temp\_target + Bias\_Air)  
1266 AirTemp\_Diff = TA\_2M\_AVG\_5min - TA\_2M\_AVG\_5minAmb  
1267 PID\_Diff\_Air = MAU\_Control - TA\_2M\_AVG\_5min  
1268 I\_Air = I\_Air + P\_Air  
1269 If I > MaxI\_Air Then I = MaxI\_Air  
1270 If I < -MaxI\_Air Then I = -MaxI\_Air  
1271 P\_Air\_Output = P\_Air \* PFact\_Air  
1272 I\_Air\_Output = I\_Air \* IFact\_Air  
1273 PID\_Scale = The range of temperature to scale the 4 to 20 mA control signal for the LP gas  
1274 furnaces.  
1275 Bias\_Air = offset  
1276  
1277 Code from the Campbell Logger  
1278  
1279 P\_Air = PID\_Diff\_Air  
1280 I\_Air = I\_Air + P\_Air  
1281 If I\_Air = NAN Then I\_Air = 0  
1282 If I\_Air > MaxI\_Air Then I\_Air = MaxI\_Air  
1283 If I\_Air < -MaxI\_Air Then I\_Air = -MaxI\_Air  
1284 P\_Air\_Output = P\_Air \* PFact\_Air  
1285 I\_Air\_Output = I\_Air \* IFact\_Air  
1286 PID\_Air\_Output = ((P\_Air\_Output + I\_Air\_Output) \* PID\_Scale\_Air) - 3000  
1287  
1288 The 4 to 20 mA interface is scaled as -3000 = 4 mA and 5000 = 20 mA  
1289 5000 + 3000 = 8000  
1290 20 - 4 = 16  
1291 16 / 8000 = .002  
1292  
1293 Example ((5000 + 3000) \* 0.002) + 4 = 20  
1294  
1295 PID\_Scale Example (1)  
1296 If we want the range of control to be 0.6 degrees C Then 8000 / 0.6 = 13333.333  
1297  
1298 PID\_Scale Example (2)  
1299 If we want the range of control to be 3.0 degrees C Then 8000 / 3 = 2666.6666  
1300  
1301 Table S1. Air Temperature PID Control Settings

| Treatment | Plot #  | P_Fact_Air | I_Fact_Air | PID_Scale_Air | MaxI_AIR | Bias_Air |
|-----------|---------|------------|------------|---------------|----------|----------|
| +2.25     | Plot_11 | 0.25       | 0.015      | 8000          | 20       | 0.02     |
| +2.25     | Plot_20 | 0.25       | 0.015      | 8000          | 20       | 0        |
| +4.5      | Plot_4  | 0.3        | 0.08       | 3555.5555     | 20       | 0        |
| +4.5      | Plot_13 | 0.3        | 0.1        | 3555.5555     | 20       | 0        |
| +6.75     | Plot_8  | 0.3        | 0.03       | 2666.6666     | 20       | 0        |

|       |         |      |       |            |    |     |
|-------|---------|------|-------|------------|----|-----|
| +6.75 | Plot_16 | 0.3  | 0.04  | 2666.6666  | 20 | 0   |
| +9    | Plot_10 | 0.25 | 0.025 | 2666.4000  | 30 | 0.5 |
| +9    | Plot_17 | 0.25 | 0.025 | 26666.4000 | 30 | 0   |

1302  
1303  
1304  
1305  
1306  
1307  
1308

Control settings for air temperature control as seen in Table S1. Air Temperature PID Control Settings are very similar but not always the same for the same treatments. This may be explained by slight differences in wind patterns across the S1 bog, differences in the efficiencies of the LP gas furnaces, and vegetation differences inside the individual plots.

1309 **Soil warming PID details**  
1310  
1311 PV = Process Variable (TS\_200cm) A,B or C Probes  
1312  $P = (TS_{200cm\_Amb\_Avg} + Temp\ Treatment) - PV$   
1313  $I = I + P$   
1314 If  $I > MaxI$  Then  $I = MaxI$   
1315 If  $I < -MaxI$  Then  $I = -MaxI$   
1316  $P\_Output = P * Pfact$   
1317  $I\_Output = I * Ifact$   
1318 PID\_Scale = The range of temperature to scale the 4 to 20 mA control signal for the SCR's  
1319 Bias\_A(B,C) = offset  
1320  
1321 Code from Logger Program  
1322  
1323  $RingA = TS_{200cm\_Amb\_Avg} + (Temp\_target + Bias\_A)$   
1324  $PID\_Diff\_A = RingA - A_{200cm}$   
1325  $P\_A = PID\_Diff\_A$   
1326  $I\_A = I\_A + P\_A$   
1327 If  $I\_A > MaxI$  Then  $I\_A = MaxI$   
1328 If  $I\_A < -MaxI$  Then  $I\_A = -MaxI$   
1329  $P\_A\_Output = P\_A * PFact\_A$   
1330  $I\_A\_Output = I\_A * IFact\_A$   
1331  $PID\_A\_Output = ((P\_A\_Output + I\_A\_Output) * PID\_Scale\_A) - 3000$   
1332  
1333 The 4 to 20 mA interface is scaled as  $-3000 = 4\ mA$  and  $5000 = 20\ mA$   
1334  $5000 + 3000 = 8000$   
1335  $20 - 4 = 16$   
1336  $16 / 8000 = .002$   
1337  
1338 Example  $((5000 + 3000) * 0.002) + 4 = 20$   
1339  
1340 PID\_Scale Example (1 )  
1341 If we want the range of control to be 0.6 degrees C Then  $8000 / 0.6 = 13333.333$   
1342  
1343 PID\_Scale Example (2 )  
1344 If we want the range of control to be 3.0 degrees C Then  $8000 / 3 = 2666.6666$   
1345  
1346

1347 Table S2. Soil temperature PID control settings

| Treatment | Plot #  | P_Fact_<br>A | I_Fact_<br>A | PID_Scale<br>A | P_Fact_<br>B | I_Fact_<br>B | PID_Scale<br>B | P_Fact_<br>C | I_Fact_<br>C | PID_Scale<br>C | MaxI | Bias_<br>A | Bias_<br>B | Bias_<br>C |
|-----------|---------|--------------|--------------|----------------|--------------|--------------|----------------|--------------|--------------|----------------|------|------------|------------|------------|
| +2.25     | PLOT_11 | 0.6          | 0.0015       | 4000           | 0.6          | 0.0015       | 4000           | 0.6          | 0.0015       | 4000           | 100  | 0          | 0          | 0.11       |
| +2.25     | PLOT_20 | 0.6          | 0.0015       | 4000           | 0.6          | 0.0015       | 4000           | 0.6          | 0.0015       | 4000           | 100  | 0          | 0          | 0          |
| +4.5      | PLOT_4  | 1.5          | 0.0011<br>3  | 3555.5555      | 1.6          | 0.0011<br>3  | 3555.5555      | 1.85         | 0.0011<br>3  | 3555.555       | 100  | 0          | 0.07       | 0.07       |
| +4.5      | PLOT_13 | 1.65         | 0.0011<br>3  | 3555.5555      | 1.6          | 0.0011<br>3  | 3555.5555      | 1.85         | 0.0011<br>3  | 3555.5555      | 100  | 0.15       | 0          | 0.1        |
| +6.75     | PLOT_8  | 2.1          | 0.0085       | 2666.6666      | 2.1          | 0.0015       | 2666.6666      | 2.2          | 0.0015       | 2666.6666      | 100  | 0.12       | 0.15       | 0.3        |
| +6.75     | PLOT_16 | 2.1          | 0.0035       | 2666.6666      | 2.1          | 0.0085       | 2666.6666      | 2.2          | 0.003        | 2666.6666      | 100  | 0.26       | 0.2        | 0.15       |
| +9        | PLOT_10 | 2.1          | 0.0015       | 2666.6666      | 2.1          | 0.0015       | 2666.6666      | 1.7          | 0.0015       | 2666.6666      | 100  | 0.4        | 0.43       | 0.2        |
| +9        | PLOT_17 | 2.1          | 0.0015       | 2666.667       | 2.1          | 0.0015       | 2666.667       | 1.7          | 0.0015       | 2666.667       | 100  | 0.45       | 0.13       | 0.34       |

1348  
1349  
1350  
1351

1352 Table S3. Time required to reach DPH differentials by treatment plot.

| Plot | Treatment (°C) | Date Soil Temp Monitoring Began | Date Treatment Began | Time Treatment Began (CST) | Days to Achieve Target °C Differentials for A and B Series within each plot |
|------|----------------|---------------------------------|----------------------|----------------------------|-----------------------------------------------------------------------------|
| 6    | Control (+0)   | 2/25/14                         | NA                   | NA                         | 0                                                                           |
| 19   | Control (+0)   | 6/18/14                         | NA                   | NA                         | 0                                                                           |
| 10   | +9             | 5/19/14                         | 6/17/14              | 14:00                      | 81                                                                          |
| 17   | +9             | 6/9/14                          | 6/17/14              | 16:00                      | 66                                                                          |
| 8    | +6.75          | 5/20/14                         | 6/25/14              | 9:30                       | 94                                                                          |
| 16   | +6.75          | 6/9/14                          | 6/23/14              | 15:55                      | 71                                                                          |
| 4    | +4.5           | 2/25/14                         | 7/2/14               | 13:00                      | 58                                                                          |
| 13   | +4.5           | 5/20/14                         | 6/26/14              | 13:30                      | 51                                                                          |
| 11   | +2.25          | 5/20/14                         | 7/1/14               | 13:00                      | 22                                                                          |
| 20   | +2.25          | 6/17/14                         | 6/25/14              | 10:00                      | 24                                                                          |

1353  
1354  
1355



1356

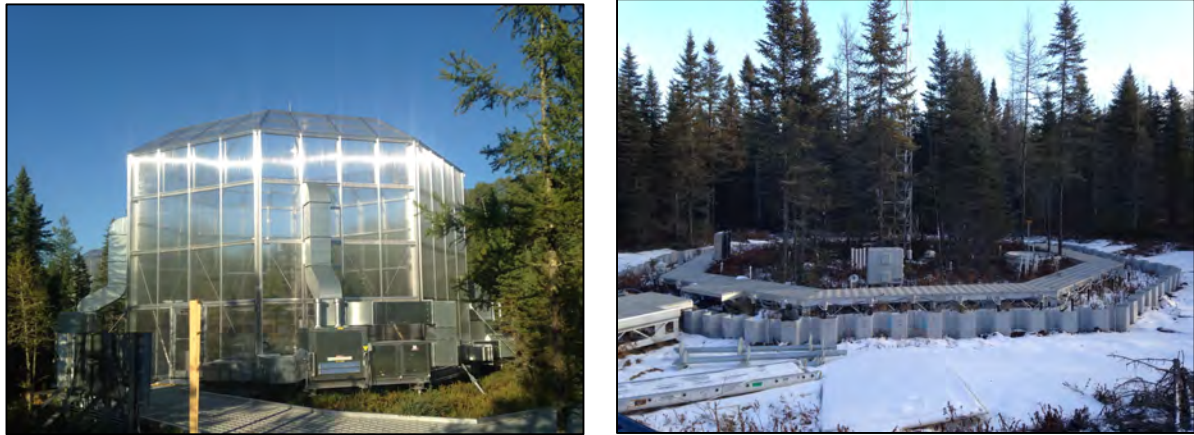

1357  
1358  
1359  
1360  
1361  
1362  
1363

**Figure S3:** Left photograph is a completed SPRUCE warming enclosure, and the right photograph shows the subtending hydrologic corral that lies beneath each enclosure. The encircling and interlocked sheet piles extend through the peat to the ancient lake bed below, and effectively isolate the hydrology of the enclosure.

### Whole Ecosystem Warming In Pictures

(6 November 2015; IR thermal Images)

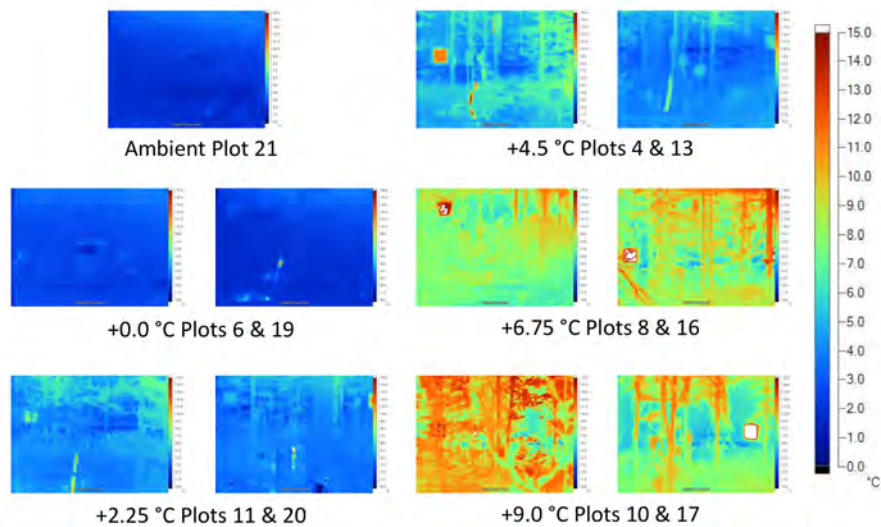

1364  
1365  
1366  
1367  
1368  
1369

**Figure S4:** Color infrared images for the space within the designated treatment enclosures and an unchambered ambient plot recorded on November 6, 2015 just before sunrise within a 30-minute period. The thermal color scale in °C applies to all images. Non-biological metal or plastic surfaces in the images may not provide an accurate temperature due to their emissivity difference from biological surfaces.

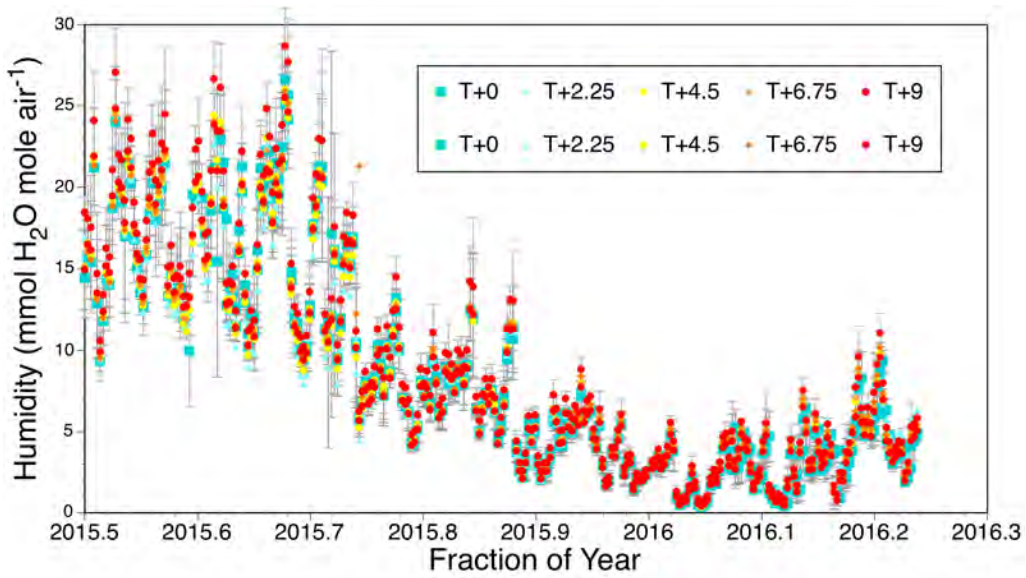

1370  
1371  
1372  
1373  
1374  
1375

**Figure S5:** Absolute humidity by treatment enclosure from mid-year 2015 through early 2016. For clarity of the image, standard error bars all in grey are included only for the control (T+0) and the warmest (T+9) plots.

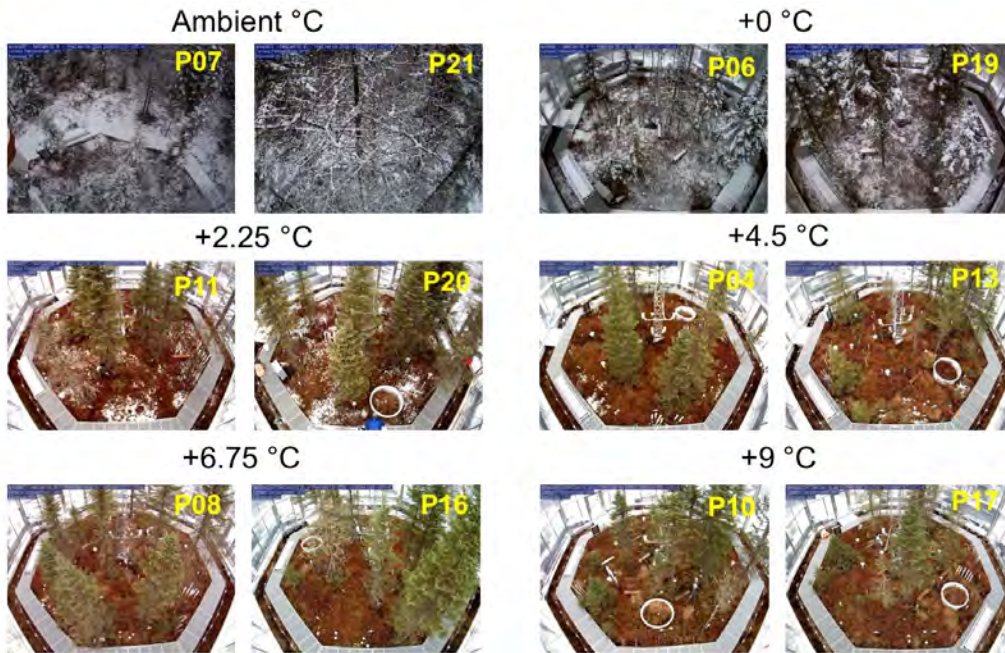

1376  
1377  
1378  
1379  
1380  
1381  
1382

**Figure S6:** Images of snow accumulation at unchambered ambient locations and within all treatment enclosures by target warming temperature differentials at 10:00 on 6 April 2016. Little obvious snow accumulation is apparent above the +4.5 °C treatment, even though precipitation in the form of snow does enter all enclosures.

1383  
1384  
1385

**Additional graphics from the SPRUCE Enclosure Energy Simulations (D. Ricciuto)**

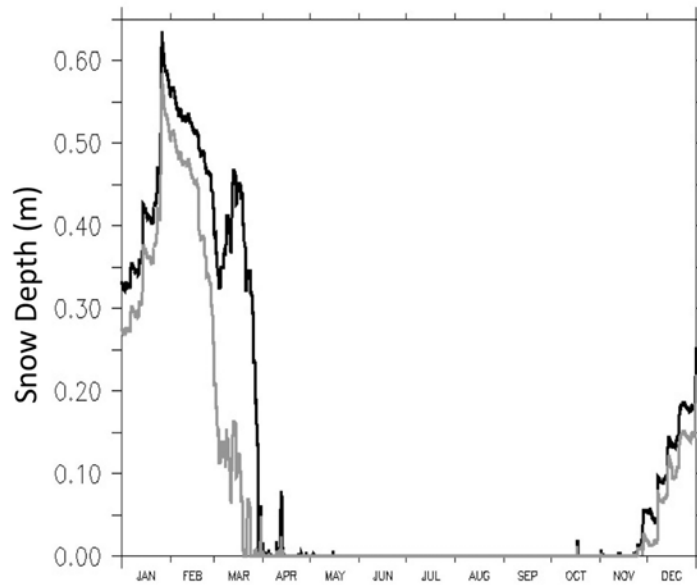

1386  
1387  
1388  
1389  
1390

**Figure S7:** Simulations of snow depth for ambient conditions (black) and within an enclosure (grey) using driver meteorology data from 2013.

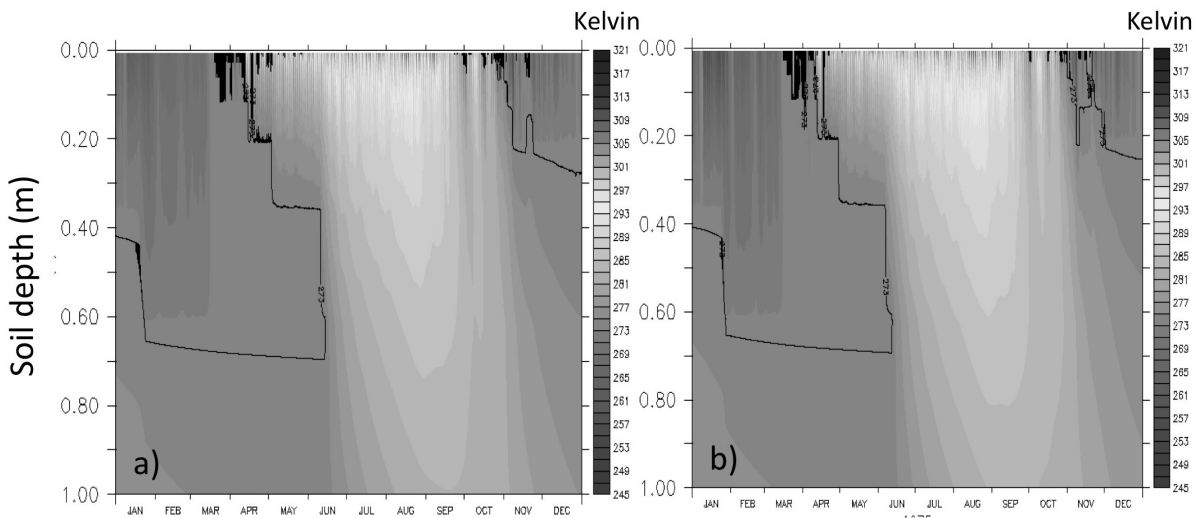

1391  
1392  
1393  
1394  
1395  
1396

**Figure S8:** Profiles of simulated top 1m soil temperature in ambient (a) and enclosure (b) simulations. Contour colors represent peat temperatures in degrees kelvin, and the black contour indicates those layers that are below freezing during the year. Ice depths are similar between the simulations.

1397 **Elevated CO<sub>2</sub> Protocol Details**

1398  
 1399 During the period from January through March 2016 when biological activities were minimal,  
 1400 various test were conducted on Plot 19 (a constructed control), Plot 11 (+2.25 °C), Plot 4 (+4.5  
 1401 °C), Plot 8 (+6.75 °C) and Plot 10 (+9 °C) to establish the CO<sub>2</sub> addition control protocols. Over a  
 1402 multi-day period with variable winds, a fixed amount of CO<sub>2</sub> ranging from 150 to 300 l min<sup>-1</sup> of  
 1403 pure CO<sub>2</sub>, depending on target temperature levels, was added to the enclosure for a multiple day  
 1404 period to generate a profile of achieved CO<sub>2</sub> differentials (mean at 0.5, 1 and 2 m heights) as a  
 1405 function of the wind velocities measured at +10 m. A fitted relationship between wind velocity at  
 1406 +10 m and enclosure fractional air turnover volumes (assuming and enclosure volume of 911 m<sup>3</sup>)  
 1407 was derived from these data. Instantaneous measured wind velocities were then applied to a  
 1408 turnover fraction equation to estimate the amount of CO<sub>2</sub> to be added to achieve a +500 μmol  
 1409 mol<sup>-1</sup> value over ambient-CO<sub>2</sub> measured within the constructed control plot (i.e., Plot 6). An  
 1410 example is as follows:

1411  $TF = (0.00001330297 * WS^6) + (-0.0003804215 * WS^5) + (0.003932579 * WS^4) +$   
 1412  $(-0.01517648 * WS^3) + (-0.004974471 * WS^2) + (0.2532064 * WS)$

1413 where TF is enclosure turnover fraction (unit less), and WS is wind velocity (m s<sup>-1</sup>). The form of  
 1414 the TF equation might also be a simple exponential function depending on the calibration data  
 1415 set for a given plot.

1416  
 1417 Using the TF value, an initial coarse control value for CO<sub>2</sub> addition was calculated as:

1418  $Course\ CO_2\ Addition = CCO_2 = EV * TF * DeltaCO_2 * 1000$

1419 where CCO<sub>2</sub> is the CO<sub>2</sub> addition rate in l min<sup>-1</sup>, EV is the enclosure volume in m<sup>3</sup> (~910 m<sup>3</sup>),  
 1420 DeltaCO<sub>2</sub> is the desired target increase in CO<sub>2</sub> above ambient conditions (500 μmol mol<sup>-1</sup> or  
 1421 0.0005 m<sup>3</sup> m<sup>-3</sup>), and 1000 allows for the conversion from m<sup>3</sup> to liters. To further account for the  
 1422 variation in enclosure turnover times with external winds the DeltaCO<sub>2</sub> values were  
 1423 supplemented with added amounts as shown in the following table.

1424  
 1425 Table S4. DeltaCO<sub>2</sub> adjustment values for low, medium and high winds by treatment plot. C

| CO <sub>2</sub> Treatment Plot # | Low Wind Adjustment (ppm) | Medium Wind Adjustment (ppm) | High Wind Adjustment (ppm) |
|----------------------------------|---------------------------|------------------------------|----------------------------|
| 4                                | 50                        | 50                           | 50                         |
| 10                               | 125                       | 75                           | 40                         |
| 11                               | 75                        | 75                           | 75                         |
| 16                               | 50                        | 25                           | 0                          |
| 19                               | 75                        | 50                           | 0                          |

1426  
 1427 Yet additional fine control to achieve target differential CO<sub>2</sub> concentrations within the enclosure  
 1428 was based on a feedback adjustment defined by the error in achieving +500 μmol mol<sup>-1</sup>.

1429  $CO_2ERR = 500 - (CO_2Enclosure - CO_2Ambient)$

1430  
 1431  $Final\ CO_2\ Addition = FCO_2 = (910.6 * CO_2ERR)/1000000*1000*1.15$

1432 where CO<sub>2</sub>ERR is the observed difference of enclosure CO<sub>2</sub> when compared with CO<sub>2</sub> in the  
 1433 constructed control (Plot 6), 1000000 and 1000 convert m<sup>3</sup> to L, and 1.15 is an arbitrary valued  
 1434 needed to achieve good results (probably accounting for unmeasured vertical winds). This

1435 combined control algorithm reevaluated every 10 seconds during active CO<sub>2</sub> additions, allowed  
 1436 us to achieve target CO<sub>2</sub> levels within the enclosure within a  $\pm 50 \mu\text{mol mol}^{-1}$  band around our  
 1437 target of + 500  $\mu\text{mol mol}^{-1}$  CO<sub>2</sub>. We will continue to adjust the algorithm for CO<sub>2</sub> additions as  
 1438 we operate to allow each enclosure to achieve  $+500 \pm 25 \mu\text{mol mol}^{-1}$  for all wind conditions and  
 1439 temperature treatments.

1440  
 1441 Elevated CO<sub>2</sub> additions are only made during daytime hours as a cost reducing measure, because  
 1442 past studies have shown that there is no direct effect of elevated CO<sub>2</sub> on respiratory processes  
 1443 (Amthor 2000, Amthor et al. 2001, Toiler et al. 2001). The elevated CO<sub>2</sub> treatments are initiated  
 1444 or stopped each day based on calculated solar angles for each day of the year using the Solpos  
 1445 algorithm developed by the National Renewable Energy Laboratory (NREL).

1446  
 1447 Table S5. Mean daily differential CO<sub>2</sub> achieved from 19 August to 1 September 2016. NA = not  
 1448 applicable.

| Warming Level and Plot            | Differential [CO <sub>2</sub> ] in ppm $\pm$ sd |
|-----------------------------------|-------------------------------------------------|
| Reference Plot - +0.00 °C Plot 06 | NA                                              |
| +2.25 °C Plot 20                  | -9 $\pm$ 8                                      |
| +4.50 °C Plot 13                  | -0.1 $\pm$ 8                                    |
| +6.75 °C Plot 13                  | -13 $\pm$ 9                                     |
| +9.00 °C Plot 04                  | 1 $\pm$ 11                                      |
| eCO <sub>2</sub> +0.00 °C Plot 19 | 483 $\pm$ 22                                    |
| eCO <sub>2</sub> +2.25 °C Plot 11 | 471 $\pm$ 21                                    |
| eCO <sub>2</sub> +4.50 °C Plot 04 | 490 $\pm$ 13                                    |
| eCO <sub>2</sub> +2.25 °C Plot 16 | 511 $\pm$ 15                                    |
| eCO <sub>2</sub> +9.00 °C Plot 10 | 480 $\pm$ 73                                    |

1449

1450

1451 Supplemental Literature

1452 Amthor, J.S.: Direct effect of elevated CO<sub>2</sub> on nocturnal in situ leaf respiration in nine temperate  
 1453 deciduous tree species is small. *Tree Physiol.* 20, 139-144, 2000.

1454

1455 Amthor, J.S., Koch, G.W., Willms, J.R., Layzell, D.B.: Leaf O<sub>2</sub> uptake in the dark is independent  
 1456 of coincident CO<sub>2</sub> partial pressure. *J Exper Bot*, 52, 2235–2238, 2011.

1457

1458 Tjoelker, M.G., Oleksyn, J., Lee, T.D., Reich, P.B.: Direct inhibition of leaf dark respiration by  
 1459 elevated CO<sub>2</sub> is minor in 12 grassland species. *New Phytol*, 150, 419–424. doi:10.1046/j.1469-  
 1460 8137.2001.00117.x, 2001.
